# Supplementary material for: Reconstructing climate trends adds skills to seasonal reference crop evapotranspiration forecasting
Source: Copernicus journal article supplement (doi:10.5194/hess-2021-494), 2021-09-29
Supplement: Supplementary file 1 [file hess-2021-494-supplement.pdf]

# Supplementary Material

## Reconstructing climate trends adds skills to seasonal reference crop evapotranspiration forecasting

Qichun Yang<sup>a</sup> \*, Quan J Wang<sup>a</sup>, Andrew Western<sup>a</sup>, Wenyan Wu<sup>a</sup>,  
Yawen Shao<sup>a</sup>, and Kirsti Hakala<sup>a</sup>

a. Department of Infrastructure Engineering, The University of Melbourne, Parkville 3010,  
Australia

\* Corresponding author

E-mail address: [qichun.yang@unimelb.edu.au](mailto:qichun.yang@unimelb.edu.au)

Telephone number: +61 0411359526

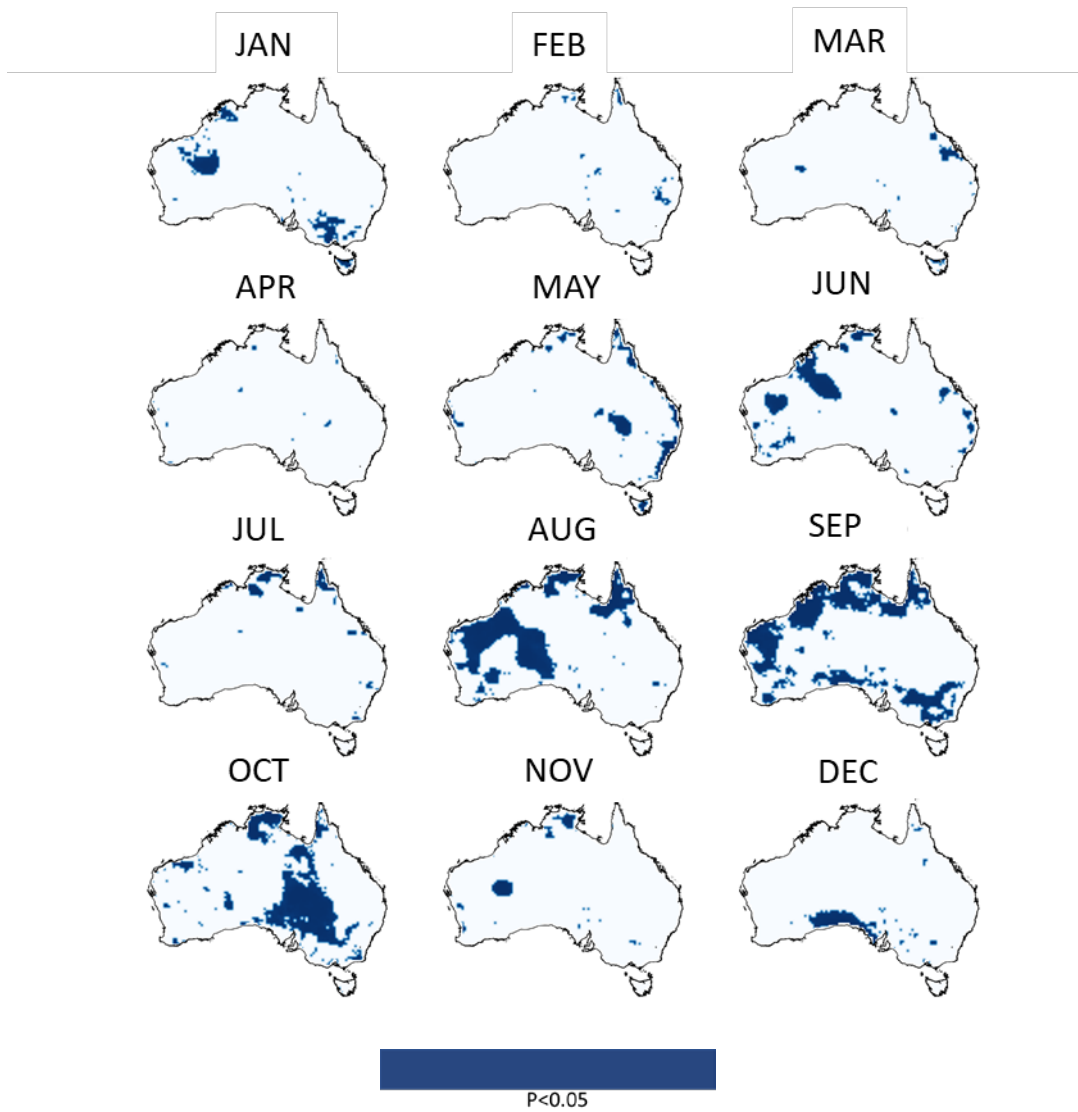

18

19

20 Fig. S1. Significance of trends in transformed  $ET_0$  observations by month. Dark blue shows regions with  
 21 statistically significant trends (at the 95% confidence interval).

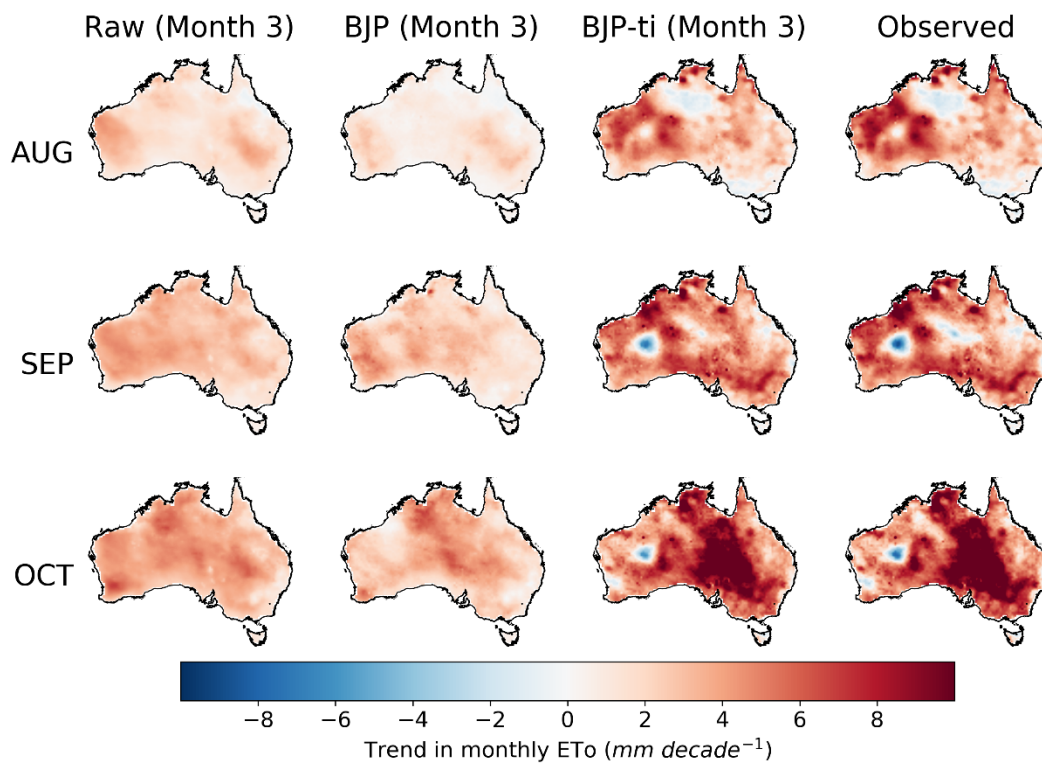

22

23

24

25

26

27

Fig. S2. Trends in raw forecasts, BJP calibrated forecasts, BJP-ti calibrated forecasts for month 3, and observed ET<sub>o</sub> for three selected months

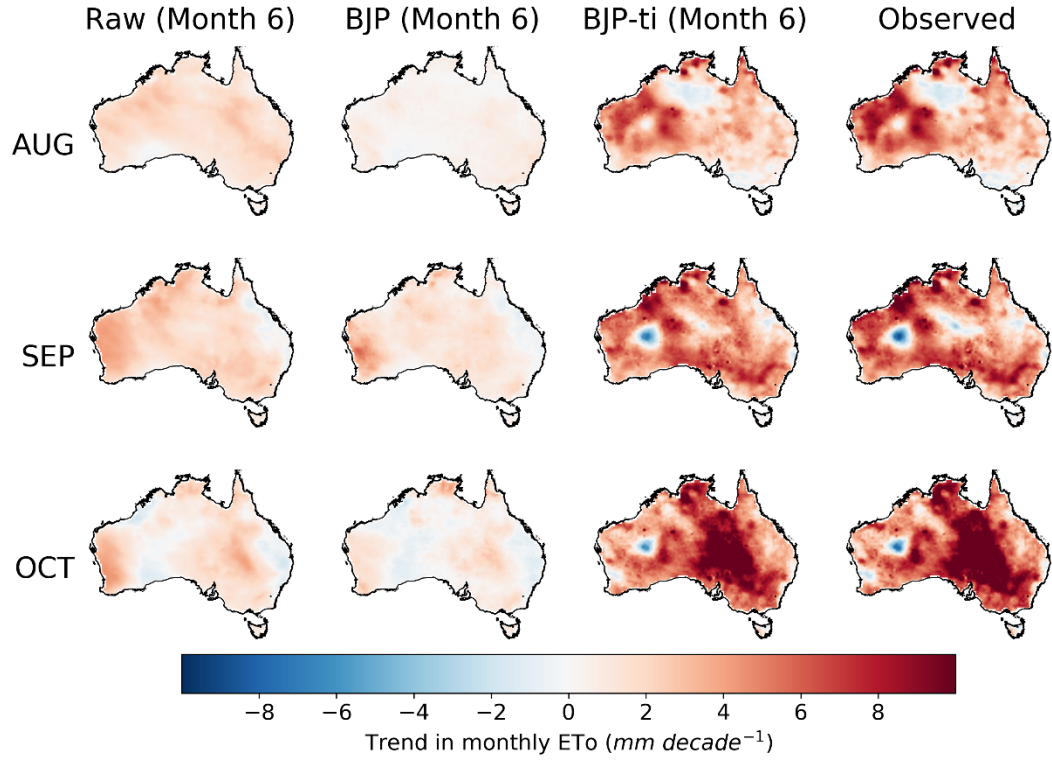

Fig. S3. Trends in raw forecasts, BJP calibrated forecasts, BJP-ti calibrated forecasts for month 6, and observed ET<sub>0</sub> for three selected months

28  
 29  
 30  
 31  
 32  
 33  
 34  
 35  
 36  
 37  
 38  
 39  
 40  
 41  
 42  
 43  
 44  
 45  
 46  
 47  
 48  
 49

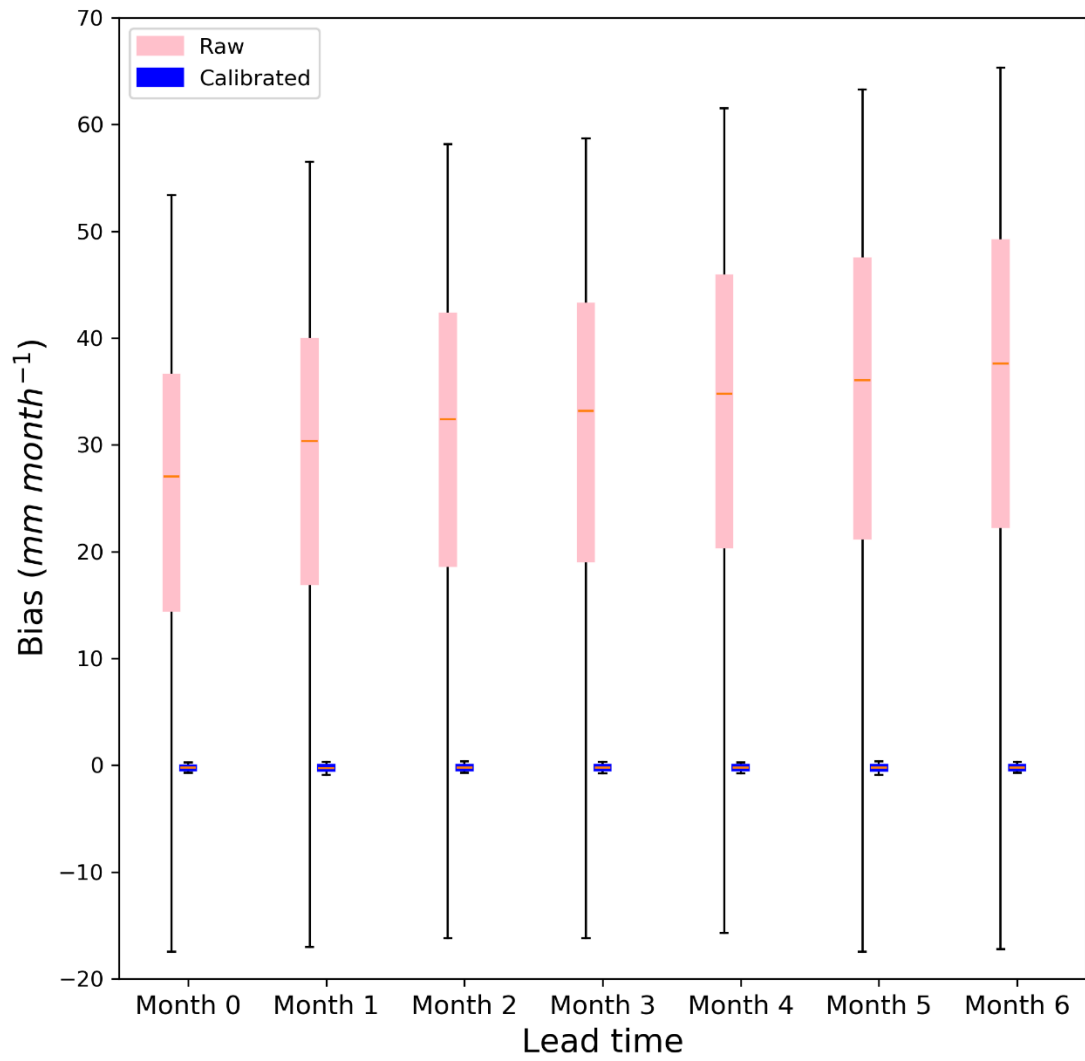

50  
51  
52

Fig. S4. Boxplot of bias in raw and BJP-ti calibrated forecasts across seven lead times

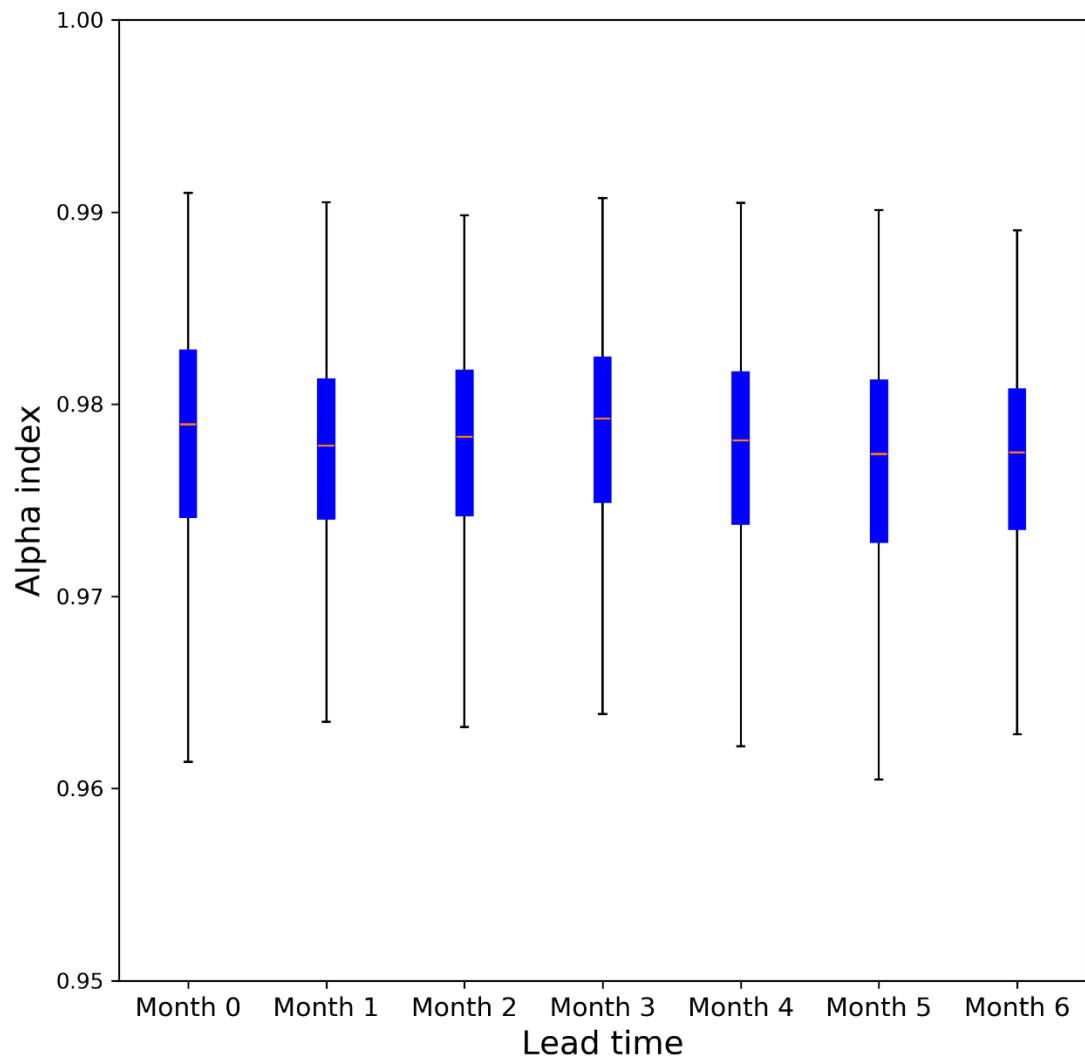

53  
54  
55  
56  
57  
58  
59  
60

Fig. S5. Boxplot of  $\alpha$ -index of BJP-ti calibrated forecasts across seven lead times
