# Supplementary material for: Reconstructing climate trends adds skills to seasonal reference crop evapotranspiration forecasting
Source: Copernicus journal article supplement (doi:10.5194/hess-2021-494), 2021-09-29
Supplement: Supplementary file [file hess-2021-494-AC1-supplement.pdf]

# Responses to Reviewer #1

1

## 2 Point #1

3 *In the manuscript “Reconstructing climate trends adds skills to seasonal reference crop*  
4 *evapotranspiration forecasting”, Yang et al adopted a new method to improve the prediction of*  
5 *evaporative water loss based on seasonal climate forecasts from the ECMWF model. This method is*  
6 *capable of dealing with the impacts of the changing climate on the prediction of future*  
7 *evapotranspiration (Reference crop evapotranspiration, ETo), and could lead to more realistic*  
8 *predictions. The changing climate has substantially altered the water cycle, representing one of the most*  
9 *critical challenges in hydrological modelling and water resource management. This work is innovative in*  
10 *taking this impact into account and addressing the challenges associated with climate change in the*  
11 *prediction of future evapotranspiration. The developed method is expected to be applicable to other*  
12 *models and thus benefit both forecasters (weather/climate centers) and forecast users (irrigators,*  
13 *hydrological modelers).*

14 *The manuscript is generally well written. Introduction clearly explains the background, challenges,*  
15 *motivation, and objective of this work; Method provides detailed information of the model, how the*  
16 *model runs are conducted, and evaluation metrics; Results generally are clear and readable; Discussion*  
17 *provides valuable insights and important implications for future improvements of climatology-based*  
18 *models in hydrological modeling and forecasting.*

19 *I encourage the authors to address the following issues before publishing this work.*

20 **Response: We appreciate the reviewer’s nice summary and constructive comments.**

21

## 22 Point #2

23 *1. For time-series data, in addition to the magnitude of trend, another important feature is the statistical*  
24 *significance. I noticed the authors had taken this into consideration in selecting the months (8,9,10) for*  
25 *evaluating the performance of trend construction. In constructing the observed trends in calibrated*  
26 *forecasts, you empirically set limits of the trends in equation 8. I understand this is to avoid extremely*  
27 *large trend values. In addition to this adjustment, I think you should limit trends to zero, in grid cells*  
28 *where observed trends are insignificant ( $P < 0.05$ ). Otherwise, the trend reconstruction may overestimate*  
29 *climate trends. I see decreases in the correlation coefficients and skill scores when compared with the*  
30 *calibration without trend reconstruction (Figures 2 and 3). I think limiting the insignificant trends could*  
31 *avoid these unwanted decreases. I suggest the authors rerun the trend-reconstruction calibration and*  
32 *take statistical significance into account. If you see improvements in the new runs, update the results*  
33 *accordingly.*

34 **Response: We agree with the reviewer that the statistical significance of trends in**  
35 **observations should be tested and used to limit the reconstructed trends. We accepted your**  
36 **valuable suggestions and redid the calibration and analysis by setting limits in trend**

37 reconstruction. Specifically, we used  $P < 0.05$  as the threshold to define statistically significant  
38 trends. For grid cells with insignificant observed trends ( $P > 0.05$ ), we set inferred trends to  
39 zero to avoid overfitting. We introduced this new strategy in section 2.3 as follows:

40 “For trends that are insignificant ( $P > 0.05$ ), we set  $m_i$  to 0 to avoid overfitting trends in calibrated  
41 forecasts. For significant trends, we set the  $m_i$  value based on trends in observations and raw forecasts  
42 during 1981-2019”

43 **New results show that this strategy is not only effective in limiting the trend reconstruction to**  
44 **regions where observed trends are significant, but also helps avoid the reductions in**  
45 **correlation coefficient and CRPS skill score caused by overfitting (Figures 2 and 3):**

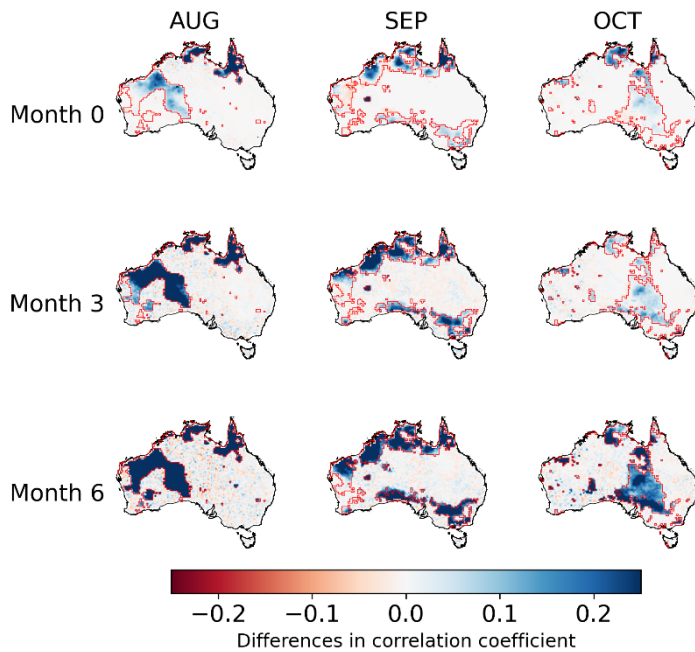

47 **Figure 2. Differences in the correlation coefficient ( $r$ ) between BJP-ti calibrated forecasts and**  
48 **observations with that between BJP calibrated forecasts and observations for three selected months**  
49 **(AUG, SEP, OCT) and three lead times (Months 0, 3, and 6). Red polygons show regions with significant**  
50 **trends.**

51

52

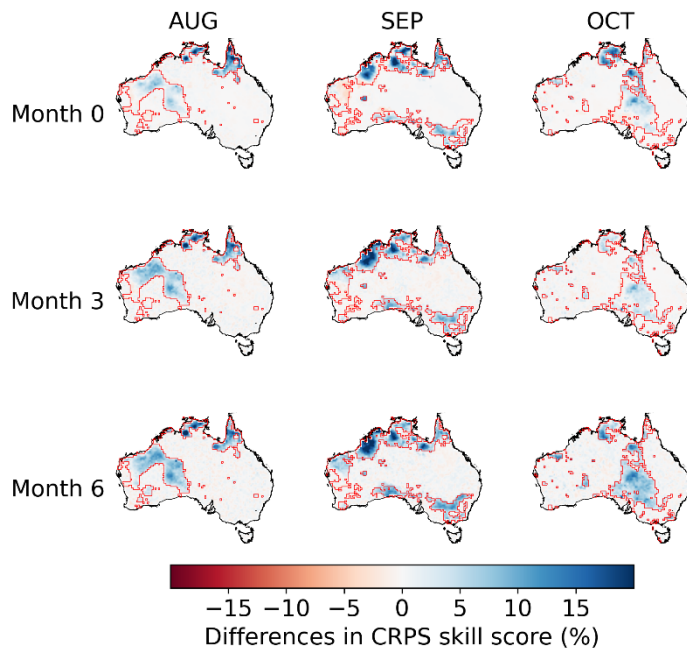

54

55 **Figure 3. Differences in CRPS skill score between BJP-ti calibrated forecasts and the BJP calibrated**  
 56 **forecasts for three selected months (AUG, SEP, OCT) and three lead times (Months 0, 3, and 6). Red**  
 57 **polygons show regions with significant observed trends.**

58

59 **We updated all results in the manuscript based on the new calibration.**

60

61 Point #3

62 *2. In addition to the improvements in the 3 selected months, whether trend construction improve the*  
 63 *calibration over the whole study period?*

64 **Response: Thank you for the valuable suggestions. We added a new figure (Figure 4) to show**  
 65 **the overall improvements in CRPS skill score and updated section 3.3 accordingly:**

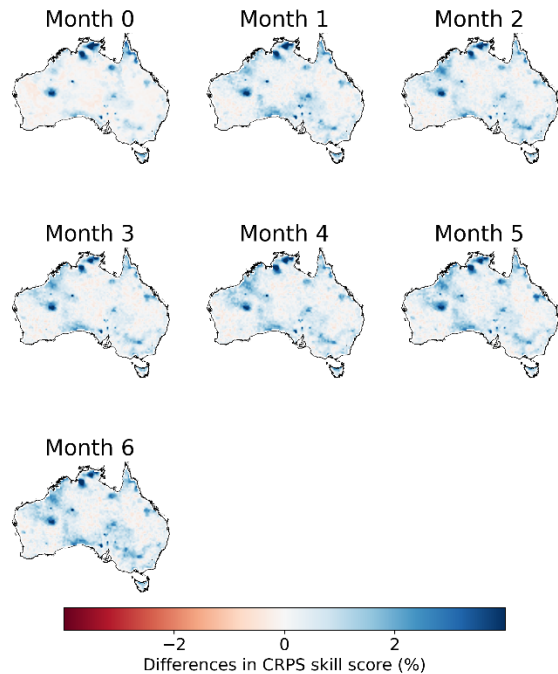

67 **Figure 4. Differences in CRPS skill score between BJP-ti calibrated forecasts and the BJP calibrated**  
 68 **forecasts over 1990-2019**

69

70 Point #4

71 *3. Presentation of the improvements in figures 2 and 3. I suggest the authors use the percentage of*  
 72 *changes to demonstrate the differences. Since correlation and skill score vary largely from short to long*  
 73 *lead times, using percentages could better demonstrate the more significant improvements at long lead*  
 74 *times.*

75 **Response: Thank you for the valuable suggestions. We did not use percentage as the unit**  
 76 **because we found that at long lead times, CRPS skill score in calibrated forecasts based on**  
 77 **the BJP model could be slightly negative, and thus make the plot based on percentage**  
 78 **confusing:**

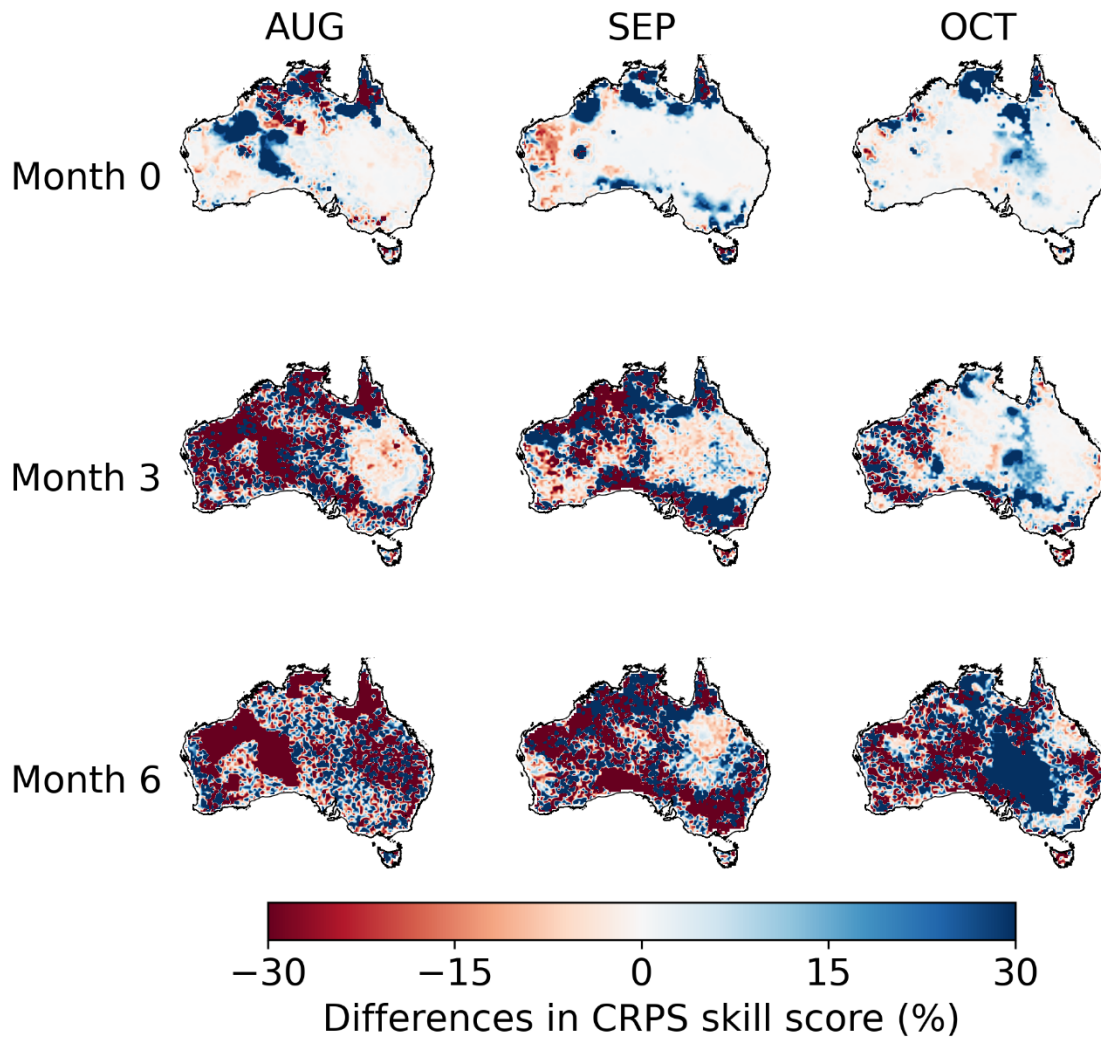

80 **As a result, we decided to use their original unit. Actually, after fixing the problems in**  
 81 **overfitting, figure 2 and 3 could better demonstrate how trend reconstruction improve the**  
 82 **correlation and skill scores, particularly at long lead times. Please see details in our response**  
 83 **to your comment #2.**

84 Point #5

85 *Specific comments:*

86 *Page 1. line 22, forecast should be forecasting*

87 **Response: We changed the wording accordingly.**

88

89 Point #6

90 *Page 3. line 92-93. This study is performed across Australia only*

91 **Response: We add the following sentence to clarify the spatial extent of this investigation:**

92 “While SEAS5 produces climate forecasts across the globe, the calibration in this study is performed  
93 across Australia only.”

94

95 Point #7

96 *Page 4. line 100, Calculation of ETo observations and forecasts*

97 **Response: We change the subtitle accordingly.**

98

99 Point #8

100 *Page 6. line 160-165. Please italicize  $k$  in this paragraph and throughout the manuscript to be consistent*  
101 *with the equations.*

102 **Response: We italicized  $k$  in the manuscript.**

103

104 Point #9

105 *Page 15. Figure 7, It is hard to read the alpha index values in the figure. Please consider changing the*  
106 *limits of the color bar, and use narrower limits (e.g.,0.8-1), to make the alpha index maps more readable.*

107 **Response: We replotted the figure with a new color bar of 0.95-1 and replaced the original**  
108 **figure:**

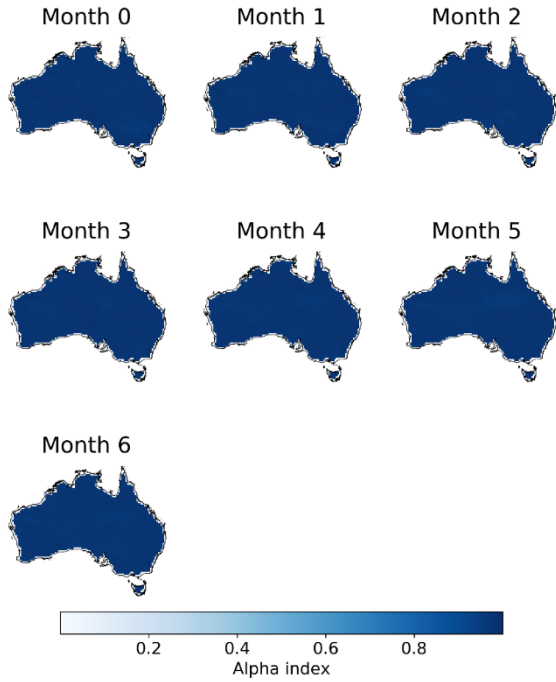

110 **With the following one:**

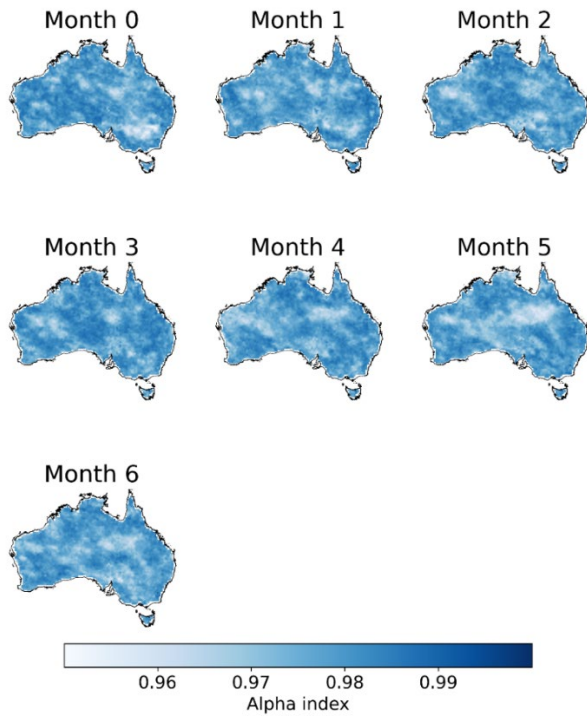

112 Point #10

113 *Page 17. line 378. To change with time?*

114 **Response: We changed the wording based on your suggestions.**
